# Supplementary material for: Retracted Article: First-principle investigations of structural, electronic, magnetic and optical properties of bulk BiVO3
Source: Royal Society of Chemistry journal article supplement (doi:10.1039/c6ra17053f), 2016-01-01
Supplement: c6ra17053f1.pdf [file c6ra17053f1.pdf]

## Supporting Information

### First-Principle Investigations of Structural, Electronic, Magnetic and Optical Properties of Bulk BiVO<sub>3</sub>

Biao Liu, Li-Juan Wu, Yu-Qing Zhao, Ling-Zhi Wang, Meng-Qiu Cai\*

School of Physics and electronics Science, Hunan University, Changsha, Hunan 410082, People's Republic of China

**S1:** The computed exchange interactions  $j_i$  are showed in Table below.

**Table:** Values of Spin Exchange Parameters (in meV) of BiVO<sub>3</sub>, determined from GGA+U calculations. The bond length is showed in Fig. 1.

| Bond length | V <sub>1</sub> -V <sub>2</sub> | V <sub>1</sub> -V <sub>3</sub> | V <sub>2</sub> -V <sub>4</sub> | V <sub>3</sub> -V <sub>4</sub> |
|-------------|--------------------------------|--------------------------------|--------------------------------|--------------------------------|
| $j_i$       | 13.45                          | -6.85                          | -4.76                          | 8.96                           |

---

\* Corresponding author. Tel.: +86 731 88821177.  
E-mail address: mqcai@hnu.edu.cn (M.Q. Cai)
